# Daisy's Funeral—Mt. Moriah Baptist Church

Donald Caton, M.D.\*

DEAR, dear Daisy,  
Lazarus could not ask  
For more. Barely dead  
Then resurrected by a  
Blast of joyous sound –  
Foot-stomping,  
Hand-clapping,  
Butt-wiggling –  
Pells of joyous sound.

Women - mostly -  
Dressed more for Sunday  
Strutting than for serious  
Mourning Prayer -  
Tight shinny dresses  
Hugging broad butts.  
Heads topped  
By wide brimmed  
Hats - a tottering ensemble  
Perched on spiked heels –

Struts not meant to  
Underpin anything  
So serious as life.  
No one ever  
Walked to Selma  
With the King in any  
Outfit made like this.

Yet there we were,  
Praise God,  
To send you off  
So you could reap  
Your hard-earned  
Just reward.  
Praise God indeed!

\* University of Florida, Gainesville, Florida. dccaton@bellsouth.net

Accepted for publication April 30, 2012.

Copyright © 2013, the American Society of Anesthesiologists, Inc. Lippincott Williams & Wilkins. Anesthesiology 2013; 118:458-9

“We’re all just passing  
Through,” Pastor said.  
“Our souls lie not  
In flesh that others  
See, but in parts  
That lie deep  
Within the dust.”

“A lily’s soul  
Rests not in its flower  
But in its root -  
The unseen part  
From which, each Spring  
Uncoils its flower.  
Life rests not  
Within the lily’s flower  
But in its root.”

Surely, Daisy,  
Though we saw you  
Every working day,  
We never saw  
The root from  
Which you sprang.

Just before we  
Loosed you from the church  
To your pine clad resting place,  
I thought Pastor’s voice  
Would fragment into shards  
Of religious passion.  
Instead, combo picked up  
Pastor’s Holy Thread.  
The congregation rose  
To sing and we sent you  
Heaven bound on shafts  
Of glorious sound.

It was,  
Dear Daisy,  
A most fitting tribute.  
I am sure you would  
Be pleased.
